# Supplementary material for: Non-monotonous size-dependent photoluminescence and excitonic relaxations in nanostructured ZnO thin films
Source: Royal Society of Chemistry journal article supplement (doi:10.1039/c8ra09370a), 2019-01-01
Supplement: c8ra09370a1.pdf [file c8ra09370a1.pdf]

## Supporting Information

### **Nonmonotonous Size-dependent Photoluminescence and Excitonic Relaxations in Nanostructured ZnO Thin Films**

Ashish C. Gandhi, Ching-Hao Liao, Wei-Li Yeh, and Yue-Lin Huang\*

Department of Physics, National Dong Hwa University, Hualien 97401, Taiwan

\* [huang\\_yuelin@mail.ndhu.edu.tw](mailto:huang_yuelin@mail.ndhu.edu.tw)

Table S1 Particle mean size  $\langle d \rangle$ , size distribution  $\sigma$ , grain size  $d_{(101)}$ , Lattice constants  $a = b$  and  $c$  for Zn and ZnO phases and the internal parameter  $u$ , and parameters  $wRp$  and  $Rp$  for fitting the XRD patterns of the ZnO/ALO films based on the “F(calc) weighted” LaBail extraction analysis.

| $T_A$<br>(°C) | SEM                         |          | $d_{(101)}$<br>ZnO<br>(nm) | Zn             |            | ZnO            |            | $u$    | $wRp$  | $Rp$   | $\chi^2$ |
|---------------|-----------------------------|----------|----------------------------|----------------|------------|----------------|------------|--------|--------|--------|----------|
|               | $\langle d \rangle$<br>(nm) | $\sigma$ |                            | $a = b$<br>(Å) | $c$ (Å)    | $a = b$<br>(Å) | $c$ (Å)    |        |        |        |          |
| RT            | 13.8(2)                     | 0.16(2)  | 2.1                        | 2.6533(11)     | 5.1315(16) | 3.2358(11)     | 5.2442(3)  | 0.3769 | 0.2638 | 0.1538 | 6.132    |
| 100           | 13.3(2)                     | 0.19(2)  | 5.3                        | 2.6569(13)     | 5.0304(24) | 3.2462(8)      | 5.2343(7)  | 0.3782 | 0.3403 | 0.2317 | 5.741    |
| 200           | 12.5(2)                     | 0.21(2)  | 6.9                        |                |            | 3.2514(8)      | 5.2191(2)  | 0.3794 | 0.2639 | 0.1794 | 4.989    |
| 300           | 13.6(2)                     | 0.18(2)  | 8.1                        |                |            | 3.2495(7)      | 5.2179(2)  | 0.3793 | 0.2492 | 0.1597 | 5.448    |
| 400           | 21.0(3)                     | 0.20(2)  | 9.6                        |                |            | 3.2525(6)      | 5.2151(5)  | 0.3797 | 0.3169 | 0.2233 | 4.235    |
| 500           | 32.8(7)                     | 0.24(3)  | 16.0                       |                |            | 3.2449(7)      | 5.2023(12) | 0.3797 | 0.3092 | 0.204  | 3.878    |
| 600           | 64(4)                       | 0.30(9)  | 26.4                       |                |            | 3.2485(5)      | 5.2066(9)  | 0.3798 | 0.3743 | 0.2436 | 3.426    |
| 700           | 60(3)                       | 0.34(6)  | 23.6                       |                |            | 3.2509(2)      | 5.2106(2)  | 0.3797 | 0.3084 | 0.1907 | 4.043    |
| 800           | 65(8)                       | 0.42(14) | 28.8                       |                |            | 3.2488(4)      | 5.2024(6)  | 0.3800 | 0.3515 | 0.2318 | 3.3      |

Table S2 Summary of the fitting parameters used for the deconvolution of PL spectra obtained from various ZnO films.

| T <sub>A</sub><br>(°C) | d <sub>(101)</sub><br>(nm) | UV band<br>(eV) |       | UV-Blue band<br>(eV) |       | Green band<br>(eV) |       | Orange band<br>(eV) |       | Red band<br>(eV) |       |
|------------------------|----------------------------|-----------------|-------|----------------------|-------|--------------------|-------|---------------------|-------|------------------|-------|
|                        |                            | Xc              | W     | Xc                   | W     | Xc                 | W     | Xc                  | W     | Xc               | W     |
| 25<br>(RT)             | 2.1                        | 3.268           | 0.138 | 2.98                 | 0.091 | 2.333              | 0.243 | 1.995               | 0.178 | 1.703            | 0.058 |
| 100                    | 5.3                        | 3.297           | 0.166 | 2.937                | 0.075 | 2.353              | 0.231 | 2.033               | 0.203 | 1.699            | 0.06  |
| 200                    | 6.9                        | 3.286           | 0.097 | 3.192                | 0.201 | 2.412              | 0.254 | 2.023               | 0.206 | 1.685            | 0.049 |
| 300                    | 8.1                        | 3.26            | 0.082 | 3.144                | 0.162 | 2.465              | 0.225 | 2.092               | 0.246 | 1.662            | 0.038 |
| 400                    | 9.6                        | 3.246           | 0.078 | 3.133                | 0.17  | 2.463              | 0.207 | 2.107               | 0.251 | 1.664            | 0.039 |
| 500                    | 16                         | 3.25            | 0.066 | 3.145                | 0.136 | 2.471              | 0.18  | 2.307               | 0.291 | 1.648            | 0.035 |
| 600                    | 26.4                       | 3.252           | 0.058 | 3.171                | 0.113 | 2.437              | 0.213 | 2.038               | 0.251 | 1.644            | 0.028 |
| 700                    | 23.6                       | 3.259           | 0.055 | 3.188                | 0.104 | 2.464              | 0.159 | 2.325               | 0.254 | 1.645            | 0.032 |
| 800                    | 28.8                       | 3.25            | 0.058 | 3.17                 | 0.111 | 2.448              | 0.178 | 2.327               | 0.332 | 1.643            | 0.029 |
